# Supplementary material
Source: Research Square preprint supplement (doi:10.21203/rs.3.rs-9519374/v1)
Supplement: Supplementary file 1 [file Source_Description.pdf › data/FRG/Source_Description.pdf]

## Data sources for national accounts and additional measures for the FRG from 1960 – 1989

### 1 DATA SOURCES

The data on the national accounts and human capital rely on various primary sources:

- [Statistisches Bundesamt \(2006\)](#) reports of the System of National Accounts (ESVG 1995), yet only available from 1970 – 1991.
- [Statistisches Bundesamt \(1991\)](#) reports of the System of National Accounts (ESVG 1976), yet only available from 1960 – 1990 and without labor market statistics.
- [Bach et al. \(1977\)](#) provide labor market statistics from 1960 – 1976.
- [Barro and Lee \(1993\)](#) provide the average years of school enrollment of the population of the FRG.
- [Deutsche Bundesbank \(2025\)](#) provides money market interest rates and consumer price inflation for the FRG.

### REFERENCES

H.-U. Bach, H. Kohler, L. Reyher, and B. Teriet. Arbeitszeit und Arbeitsvolumen in der Bundesrepublik Deutschland 1960-1975. *Mitteilungen aus der Arbeitsmarkt- und Berufsforschung*, 10, 1977.

R. J. Barro and J.-W. Lee. International comparisons of educational attainment. *Journal of monetary economics*, 32(3):363–394, 1993.

Deutsche Bundesbank. *Long Time Series on Economic Development in Germany*. Frankfurt am Main, 2025. URL <https://www.bundesbank.de/en/statistics/sets-of-indicators/long-time-series/long-time-series-802922>.

Statistisches Bundesamt. Inlandsproduktsberechnung Revidierte Ergebnisse 1950 bis 1990. *Volkswirtschaftliche Gesamtrechnungen Fachserie 18 Reihe 1.5*, 1991.

Statistisches Bundesamt. Inlandsproduktsberechnung Revidierte Ergebnisse 1970 bis 1991. *Volkswirtschaftliche Gesamtrechnungen Fachserie 18 Reihe S.29*, 2006.
