# Supplementary material
Source: Research Square preprint supplement (doi:10.21203/rs.3.rs-9519374/v1)
Supplement: Supplementary file 2 [file Source_Desricption.pdf › data/GDR/Source_Desricption.pdf]

# Data report for national accounts and additional measures for the GDR from 1950 – 1989

## 1 DATA SOURCES

The data on the national accounts and human capital rely on various primary sources:

- [Statistisches Bundesamt \(2000\)](#) provides a comprehensive translation from Material Product System to the System of National Accounts (ESVG 1995), yet only available in current prices and from 1970 – 1989.
- Based on [Statistisches Bundesamt \(2000\)](#), [Heske \(2009\)](#) extend the data set. [Heske \(2009\)](#) provides data starting from 1950 and reports them at constant prices (1995 Euro).
- [Arbeitskreis "Volkswirtschaftliche Gesamtrechnungen der Länder" \(2007\)](#) provides data on the capital stock of the area of the former GDR in 1991 based on ESVG 1995.
- [Schmalwasser \(2001\)](#) provides a calculation algorithm to translate the capital stock data from [Arbeitskreis "Volkswirtschaftliche Gesamtrechnungen der Länder" \(2007\)](#) to the capital stock of the GDR on the eve of the German reunification.
- [Statistisches Bundesamt \(1994\)](#) provides data on the amount of labor force from 1950 – 1989.
- [Sleifer \(2014\)](#) provides data on average hours worked per employee in the industry.
- [Barro and Lee \(1993\)](#) provide the average years of school enrollment of the population of the GDR.
- [Staatliche Zentralverwaltung für Statistik \(1980, Bundesarchiv DE/2/30075/51\)](#) provides data on depreciation rates pre-1970 and [Heske \(2009\)](#)-consistent nominal values for investment and consumption for deflators.

## REFERENCES

Arbeitskreis "Volkswirtschaftliche Gesamtrechnungen der Länder". Anlagevermögen in den ländern und ost-west-großraumregionen deutschlands. Esvg 1995, Statistische Ämter der 16 Bundesländer, Statistisches Bundesamtes und Statistisches Amt Wirtschaft und Kultur der Landeshauptstadt Stuttgart., 2007.

- R. J. Barro and J.-W. Lee. International comparisons of educational attainment. *Journal of monetary economics*, 32(3):363–394, 1993.
- G. Heske. Volkswirtschaftliche gesamtrechnung ddr 1950-1989: Daten, methoden, vergleiche. *Historical Social Research, Supplement*, (21):359, 2009. ISSN 0936-6784.
- O. Schmalwasser. Revision der anlagevermögensrechnung 1991 bis 2001, 2001. ISSN 0043-6143. In: Wirtschaft und Statistik.
- J. Sleifer. *Planning ahead and falling behind: the East German economy in comparison with West Germany 1936-2002*, volume 8. Walter de Gruyter GmbH & Co KG, 2014.
- Staatliche Zentralverwaltung für Statistik. Statistisches jahrbuch des gesellschaftlichen gesamtproduktes und des nationaleinkommens. Technical report, Staatliche Zentralverwaltung für Statistik, 1980.
- Statistisches Bundesamt. Erwerbstätige 1950 bis 1989. *Sonderreihe mit Beiträgen für das Gebiet der ehemaligen DDR*, 14, 1994.
- Statistisches Bundesamt. Entstehung und verwendung des bruttoinlandsprodukts 1970 bis 1989. *Sonderreihe mit Beiträgen für das Gebiet der ehemaligen DDR*, 33, 2000.
