# Supplementary material
Source: Research Square preprint supplement (doi:10.21203/rs.3.rs-9519374/v1)
Supplement: Supplementary file 3 [file readme_GDR.pdf › readme_GDR.pdf]

Daniel Fehrle and Vasilij Konysev

**Read-Me for the article**

A “Marginal” Tale of Two Germanies: Accounting for the Systemic Divide

April 23, 2026

**Preface** This document provides an overview of the data and computer codes required to replicate all results in the paper and the appendix. The main zipped folder `GDRPap_repl.zip` contains three subfolders `/comp`, `/data`, `/pars`, and `/pic` that will be explained in the following. The programs have been written for Matlab, Version R2019a and Gauss, Version 23.

**Data construction and preparation (subfolder `/data`)** The folder contains two subfolders: FRG and GDR. Each folder contains the code that compiles the dataset for the respective country (`DATA.m`, the paper and the data appendix describe the processing in detail). This code uses primary data (see `Source_Description.pdf` for source description), to compile csv-data in absolute values (`abs`), per capita (`pc`), and per output (`py`). The programs compile data on gross and net capital stocks (`_net`). The files `mny` are the consumption price inflation and nominal interest rates in the GDR (`_e`) and FRG (`_w`). The file `no_unemp.csv` contains the data on unemployment and employment used.

**Computer code - baseline results (subfolder `/comp`)** The baseline results of the paper can be reproduced by sequentially executing the following three Gauss programs (mostly commented inside as well):

- I. `ew1960_wa_quantify.gss` processes the data from subfolder `/data`. It calibrates model parameters, computes the model variables, computes the steady state, and derives the corresponding wedges. The program stores csv-tables for Figures and Tables in the paper, and `.ftm` data in `/pars/net` for further computational processing.
- II. `ew1960_wa_analyze.gss` processes the data from `/pars/net` and performs the counterfactual experiments, and the welfare analysis. The program stores csv-tables for Figures and Tables in the paper.
- III. `ew1960_wa_bond.gss` uses results from subfolder `/pars/net` and data on consumption price inflation and nominal interest rates from `/data`. It computes the bond wedges for the discussion section in the paper.

The file `NLEQ.src` contains routines for solving systems of non-linear equations from [Heer and Maußner \(2024\)](#).

**Computer code - robustness checks (subfolder `/comp`)** The following two programs execute parameter sensitivity checks of welfare measures (mostly commented inside as well):

- `ew1960_wa_sensitivity_theta.gss` uses results from subfolder `/pars/net`. It conducts the sensitivity analysis regarding the parameter  $\theta$ , and stores csv-tables in `/pic/dat` for Figure on parameter sensitivity (Panel (a)).

- `ew1960_wa_sensitivity_beta.gss` uses results from subfolder `/pars/net`. It conducts the sensitivity analysis regarding the parameter  $\beta$ , and stores csv-tables in `/pic/dat` for Figure on parameter sensitivity (Panel (b)).

Adopting the structure of the programs `ew1960_wa_quantify.gss` (I) and `ew1960_wa_analyze.gss` (II), the following programs (mostly commented inside as well) conduct further robustness checks documented in Section 6 in the paper:

- `ew1960_wa_quantify_noh.gss` and `ew1960_wa_analyze_noh.gss` execute I and II using a model without human capital in the production function.
- `ew1960_wa_quantify_nog.gss` and `ew1960_wa_analyze_nog.gss` execute I and II using a model with log-utility that omits government consumption in the consumption aggregator.
- `ew1960_wa_quantify_net.gss` and `ew1960_wa_analyze_net.gss` execute I and II with observed capital input measured in net instead of gross terms.
- `ew1960_wa_quantify_noqc.gss` and `ew1960_wa_analyze_noqc.gss` execute I and II using a model where labor and consumption quantity constraints are disregarded.

## REFERENCES

Heer, Burkhard and Alfred Maußner (2024) *Dynamic General Equilibrium Modeling: Computational Methods and Applications*, 3rd edition: Springer Cham, <https://doi.org/10.1007/978-3-031-51681-8>.
